# Supplementary material
Source: publisher site journal article supplement (https://www.dovepress.com/article/463164)
Supplement: Supplementary file 1 [file get_supplementary_file.php]

**Appendix 1.** Associations between patients’ adherence to DOACs and baseline characteristics

| **Variable** | **Non-adherence**  **(n=9)** | **Adherence**  **(n=91)** | **p-value** |
| --- | --- | --- | --- |
| Gender  Male (n=61)  Female (n=34) | 6 (66.7%)  3 (33.3%) | 55 (60.4%)  31 (34.1%) | 0.872  *(Pierson’s Chi2 test)* |
| Indication  Atrial fibrillation  Venous thromboembolism  Other | 9 (100%)  0 (0%)  0 (0%) | 72 (79.1%)  11 (12.1%)  8 (8.8%) | 0.244  *(Pierson’s Chi2 test)* |
| DOAC  Apixaban  Dabigatran  Edoxaban  Rivaroxaban | 2 (22.2%)  2 (22.2%)  2 (22.2%)  3 (33.3%) | 17(18.7%)  12 (13.2%)  34 (37.4%)  28 (30.1%) | 0.784  *(Pierson’s Chi2 test)* |
| Dosage  Once a day  Twice a day | 5 (55.6%)  4 (44.4%) | 62 (68.1%)  29 (31.9%) | 0.444  (*Pierson’s Chi2 test)* |
